# Supplementary material for: The severity of mental disorders is linked to interaction among candidate genes
Source: Royal Society of Chemistry journal article supplement (doi:10.1039/c2ib20066j), 2012-01-01
Supplement: c2ib20066j.pdf [file c2ib20066j.pdf]

## SUPPLEMENTARY INFORMATION:

**Table S1 : A comparative account of degree in 228 coexpressing genes in normal (CONT), unipolar depression (DEP), bipolar disorder (BPD) and schizophrenia (SCZ).**

| <b>GENE</b>     | <b>CONT</b> | <b>DEP</b> | <b>BPD</b> | <b>SCZ</b> |
|-----------------|-------------|------------|------------|------------|
| <i>NRG1</i>     | 88          | 89         | 105        | 96         |
| <i>DISC1</i>    | 69          | 108        | 69         | 72         |
| <i>COMT</i>     | 82          | 78         | 87         | 73         |
| <i>BDNF</i>     | 90          | 76         | 85         | 83         |
| <i>ISLR</i>     | 67          | 76         | 97         | 94         |
| <i>POMZP3</i>   | 68          | 88         | 78         | 87         |
| <i>KRT17</i>    | 80          | 68         | 78         | 86         |
| <i>POLR2A</i>   | 85          | 75         | 98         | 73         |
| <i>PIK3R3</i>   | 74          | 77         | 83         | 104        |
| <i>EML2</i>     | 70          | 71         | 75         | 76         |
| <i>DSTYK</i>    | 74          | 71         | 87         | 72         |
| <i>NFASC</i>    | 89          | 84         | 78         | 84         |
| <i>IKBKAP</i>   | 80          | 85         | 83         | 102        |
| <i>GCN1L1</i>   | 78          | 71         | 75         | 70         |
| <i>DOTIL</i>    | 70          | 67         | 101        | 83         |
| <i>TLX1</i>     | 67          | 85         | 74         | 74         |
| <i>PPRC1</i>    | 69          | 74         | 103        | 79         |
| <i>OR2F1</i>    | 76          | 72         | 80         | 70         |
| <i>CPSF4</i>    | 81          | 70         | 107        | 86         |
| <i>PXDN</i>     | 69          | 82         | 75         | 76         |
| <i>PKD1</i>     | 67          | 76         | 101        | 76         |
| <i>GOLGA3</i>   | 67          | 67         | 75         | 79         |
| <i>REMI</i>     | 76          | 72         | 90         | 83         |
| <i>TUBA3CDE</i> | 86          | 82         | 79         | 91         |
| <i>TUBA3CD</i>  | 108         | 78         | 102        | 90         |
| <i>GNE</i>      | 73          | 77         | 70         | 79         |
| <i>ARIH2</i>    | 69          | 71         | 97         | 70         |
| <i>WDR45</i>    | 77          | 76         | 106        | 76         |
| <i>SNRNP70</i>  | 82          | 68         | 73         | 78         |
| <i>FBXO21</i>   | 73          | 75         | 75         | 71         |
| <i>CYP2B6</i>   | 74          | 74         | 81         | 79         |
| <i>KPNA6</i>    | 74          | 78         | 86         | 78         |
| <i>COL4A4</i>   | 71          | 94         | 70         | 75         |

|                  |     |     |     |     |
|------------------|-----|-----|-----|-----|
| <i>PDPN</i>      | 75  | 80  | 83  | 79  |
| <i>MRPL33</i>    | 75  | 71  | 91  | 75  |
| <i>EFNA5</i>     | 71  | 70  | 71  | 94  |
| <i>PSG9</i>      | 72  | 78  | 67  | 78  |
| <i>SFRS16</i>    | 74  | 73  | 75  | 67  |
| <i>CCT7</i>      | 76  | 81  | 90  | 73  |
| <i>COL11A2</i>   | 78  | 68  | 80  | 74  |
| <i>CNKSRI</i>    | 74  | 81  | 64  | 103 |
| <i>CD9</i>       | 71  | 85  | 74  | 93  |
| <i>EP400</i>     | 70  | 79  | 76  | 81  |
| <i>AKAP8</i>     | 75  | 76  | 98  | 77  |
| <i>SIVA1</i>     | 71  | 72  | 100 | 71  |
| <i>IDO1</i>      | 85  | 76  | 69  | 84  |
| <i>COX7A2L</i>   | 67  | 86  | 97  | 77  |
| <i>SLC29A1</i>   | 75  | 83  | 73  | 94  |
| <i>STX12</i>     | 73  | 87  | 95  | 92  |
| <i>CSNK1E</i>    | 75  | 76  | 71  | 78  |
| <i>CRKRS</i>     | 82  | 99  | 76  | 72  |
| <i>TUBG1</i>     | 100 | 78  | 86  | 92  |
| <i>IFNG</i>      | 77  | 70  | 82  | 85  |
| <i>SUMO2-3</i>   | 73  | 95  | 89  | 103 |
| <i>MTF1</i>      | 62  | 69  | 91  | 81  |
| <i>ST3GAL6</i>   | 75  | 82  | 74  | 67  |
| <i>COBRA1</i>    | 69  | 75  | 82  | 73  |
| <i>CDV3</i>      | 82  | 105 | 77  | 101 |
| <i>FOXH1</i>     | 64  | 74  | 86  | 79  |
| <i>DPH1</i>      | 79  | 66  | 93  | 77  |
| <i>HEG1</i>      | 89  | 71  | 78  | 75  |
| <i>CYP2A7</i>    | 90  | 70  | 59  | 82  |
| <i>BMP6</i>      | 80  | 61  | 82  | 81  |
| <i>EI24</i>      | 82  | 76  | 74  | 91  |
| <i>TBC1D4</i>    | 81  | 77  | 80  | 63  |
| <i>RAP1GAP</i>   | 94  | 83  | 76  | 96  |
| <i>NPTX1</i>     | 84  | 75  | 95  | 98  |
| <i>FGFR1</i>     | 68  | 73  | 63  | 75  |
| <i>SF3A2</i>     | 86  | 94  | 73  | 99  |
| <i>VPS39</i>     | 78  | 86  | 99  | 67  |
| <i>TNFRSF11A</i> | 70  | 77  | 86  | 73  |

|                  |     |     |     |     |
|------------------|-----|-----|-----|-----|
| <b>VAPB</b>      | 115 | 79  | 90  | 96  |
| <b>TFF2</b>      | 79  | 91  | 68  | 85  |
| <b>PARVB</b>     | 85  | 80  | 93  | 92  |
| <b>CNOT8</b>     | 68  | 73  | 74  | 79  |
| <b>PSMD4</b>     | 74  | 77  | 93  | 88  |
| <b>AVIL</b>      | 70  | 77  | 75  | 65  |
| <b>RPS6KA1</b>   | 69  | 77  | 71  | 80  |
| <b>EIF2B4</b>    | 86  | 73  | 85  | 78  |
| <b>NELL2</b>     | 82  | 121 | 109 | 95  |
| <b>RABGGTA</b>   | 75  | 80  | 71  | 102 |
| <b>PIP4K2A</b>   | 78  | 75  | 86  | 89  |
| <b>PCDH17</b>    | 72  | 79  | 74  | 70  |
| <b>PCMT1</b>     | 78  | 88  | 96  | 106 |
| <b>NUP62</b>     | 73  | 71  | 73  | 70  |
| <b>ATP6V1B2</b>  | 82  | 89  | 96  | 84  |
| <b>HSF2</b>      | 75  | 82  | 84  | 100 |
| <b>DGKD</b>      | 83  | 67  | 77  | 78  |
| <b>PRPSAP1</b>   | 80  | 91  | 76  | 89  |
| <b>RFC4</b>      | 82  | 81  | 76  | 70  |
| <b>OSTF1</b>     | 66  | 74  | 78  | 101 |
| <b>PTPRN</b>     | 98  | 72  | 79  | 91  |
| <b>PVT1</b>      | 81  | 74  | 77  | 65  |
| <b>PDE1A</b>     | 66  | 67  | 102 | 70  |
| <b>MYBL1</b>     | 91  | 76  | 76  | 87  |
| <b>ZNF507</b>    | 83  | 71  | 61  | 81  |
| <b>STMN2</b>     | 78  | 84  | 95  | 82  |
| <b>MAP3K8</b>    | 85  | 66  | 85  | 70  |
| <b>HOXD1</b>     | 63  | 73  | 78  | 74  |
| <b>PRPH</b>      | 75  | 65  | 79  | 78  |
| <b>SMC4</b>      | 65  | 60  | 84  | 82  |
| <b>MAPK8</b>     | 74  | 66  | 85  | 67  |
| <b>PDK3</b>      | 91  | 69  | 74  | 68  |
| <b>FYB</b>       | 72  | 74  | 72  | 69  |
| <b>GABARAPL1</b> | 94  | 85  | 89  | 94  |
| <b>JMJD6</b>     | 104 | 72  | 80  | 75  |
| <b>MC2R</b>      | 98  | 77  | 66  | 77  |
| <b>COPB1</b>     | 73  | 81  | 84  | 106 |
| <b>LMNB2</b>     | 90  | 89  | 77  | 77  |

|                 |     |     |     |     |
|-----------------|-----|-----|-----|-----|
| <i>PCGF2</i>    | 77  | 78  | 79  | 81  |
| <i>RAC3</i>     | 97  | 79  | 81  | 80  |
| <i>TLE4</i>     | 70  | 84  | 74  | 93  |
| <i>DPT</i>      | 71  | 72  | 87  | 67  |
| <i>TACC2</i>    | 71  | 79  | 104 | 92  |
| <i>PRKAG1</i>   | 101 | 107 | 82  | 95  |
| <i>PPAP2A</i>   | 75  | 84  | 76  | 86  |
| <i>EPHB3</i>    | 100 | 103 | 72  | 68  |
| <i>AMACR</i>    | 56  | 78  | 69  | 81  |
| <i>ARPC4</i>    | 88  | 99  | 83  | 97  |
| <i>RER1</i>     | 86  | 87  | 70  | 76  |
| <i>MSC</i>      | 82  | 85  | 73  | 68  |
| <i>HTR2A</i>    | 92  | 70  | 89  | 74  |
| <i>CYB561D2</i> | 77  | 74  | 80  | 70  |
| <i>PKD2</i>     | 98  | 73  | 70  | 96  |
| <i>SLC25A1</i>  | 95  | 71  | 77  | 86  |
| <i>SREBF2</i>   | 88  | 100 | 86  | 85  |
| <i>NCAPH2</i>   | 77  | 86  | 73  | 75  |
| <i>NPTX2</i>    | 90  | 103 | 84  | 65  |
| <i>ACOT8</i>    | 119 | 101 | 81  | 95  |
| <i>POLG</i>     | 89  | 87  | 70  | 86  |
| <i>AP4S1</i>    | 81  | 115 | 70  | 78  |
| <i>UBE2S</i>    | 112 | 100 | 86  | 104 |
| <i>RAD50</i>    | 98  | 99  | 88  | 95  |
| <i>VCAN</i>     | 87  | 74  | 82  | 64  |
| <i>FNTB</i>     | 92  | 75  | 66  | 80  |
| <i>POLR2E</i>   | 90  | 80  | 92  | 102 |
| <i>RPP30</i>    | 76  | 73  | 70  | 72  |
| <i>HMGCR</i>    | 89  | 91  | 76  | 79  |
| <i>CCL4</i>     | 83  | 79  | 77  | 72  |
| <i>FDFT1</i>    | 83  | 69  | 83  | 79  |
| <i>TLL1</i>     | 91  | 84  | 94  | 82  |
| <i>TFDP1</i>    | 92  | 78  | 70  | 86  |
| <i>MPV17</i>    | 111 | 84  | 82  | 80  |
| <i>WNT7A</i>    | 87  | 89  | 84  | 69  |
| <i>ZMYM4</i>    | 93  | 92  | 68  | 89  |
| <i>HDAC5</i>    | 88  | 80  | 68  | 99  |
| <i>RND2</i>     | 81  | 89  | 75  | 80  |

|                   |     |     |    |     |
|-------------------|-----|-----|----|-----|
| <b>MAPK13</b>     | 93  | 101 | 70 | 100 |
| <b>NCOR2</b>      | 76  | 5   | 72 | 81  |
| <b>FABP3</b>      | 76  | 80  | 73 | 70  |
| <b>RXRG</b>       | 89  | 92  | 76 | 93  |
| <b>HIFX</b>       | 100 | 112 | 98 | 96  |
| <b>CDIPT</b>      | 107 | 95  | 69 | 92  |
| <b>GHMPB2</b>     | 77  | 90  | 69 | 74  |
| <b>MPG</b>        | 97  | 100 | 81 | 87  |
| <b>SH3BP1</b>     | 109 | 107 | 81 | 84  |
| <b>RHOBTB2</b>    | 94  | 101 | 75 | 72  |
| <b>IQCK</b>       | 73  | 82  | 67 | 72  |
| <b>MRAS</b>       | 66  | 79  | 83 | 74  |
| <b>ARHGEF15</b>   | 72  | 70  | 62 | 80  |
| <b>EXDL2</b>      | 77  | 89  | 89 | 83  |
| <b>SCP2</b>       | 86  | 84  | 88 | 93  |
| <b>VEGFB</b>      | 104 | 107 | 67 | 100 |
| <b>ZNF428</b>     | 100 | 88  | 73 | 107 |
| <b>MMP15</b>      | 74  | 79  | 76 | 68  |
| <b>OPA1</b>       | 88  | 99  | 65 | 101 |
| <b>GNAI2</b>      | 84  | 79  | 64 | 88  |
| <b>RGS12</b>      | 90  | 106 | 72 | 87  |
| <b>LPCAT1</b>     | 100 | 98  | 79 | 71  |
| <b>HTRA2</b>      | 69  | 92  | 94 | 94  |
| <b>NEU1</b>       | 102 | 91  | 90 | 88  |
| <b>IGF2BP3</b>    | 71  | 78  | 71 | 65  |
| <b>MAST1</b>      | 84  | 113 | 63 | 96  |
| <b>CUL7</b>       | 78  | 78  | 82 | 75  |
| <b>DOC2A</b>      | 99  | 122 | 75 | 101 |
| <b>CAMK1</b>      | 87  | 101 | 67 | 88  |
| <b>NAV3</b>       | 104 | 91  | 72 | 73  |
| <b>TOMM40</b>     | 104 | 80  | 77 | 100 |
| <b>NCRNA00094</b> | 87  | 74  | 68 | 80  |
| <b>HSF1</b>       | 89  | 83  | 79 | 91  |
| <b>NR1H2</b>      | 74  | 64  | 76 | 87  |
| <b>AGPAT1</b>     | 112 | 100 | 76 | 75  |
| <b>BTF3</b>       | 82  | 74  | 73 | 73  |
| <b>CSNK1D</b>     | 85  | 98  | 90 | 82  |
| <b>ZNF165</b>     | 70  | 68  | 76 | 79  |

|                 |     |     |     |     |
|-----------------|-----|-----|-----|-----|
| <i>APITDI</i>   | 99  | 82  | 68  | 72  |
| <i>CSNK2A1</i>  | 98  | 77  | 81  | 84  |
| <i>IHH</i>      | 74  | 76  | 73  | 88  |
| <i>MRI</i>      | 54  | 64  | 70  | 73  |
| <i>TUSC4</i>    | 124 | 91  | 85  | 100 |
| <i>PPEF1</i>    | 108 | 96  | 81  | 86  |
| <i>TRIP13</i>   | 72  | 74  | 77  | 67  |
| <i>CDC34</i>    | 105 | 83  | 72  | 95  |
| <i>ZNF175</i>   | 101 | 68  | 70  | 87  |
| <i>TEK</i>      | 81  | 91  | 84  | 82  |
| <i>KIR3DL2</i>  | 66  | 77  | 69  | 68  |
| <i>RFC5</i>     | 69  | 75  | 80  | 78  |
| <i>PPT2</i>     | 89  | 80  | 82  | 104 |
| <i>LRBA</i>     | 86  | 97  | 72  | 92  |
| <i>PRKACA</i>   | 95  | 75  | 78  | 76  |
| <i>PPP1R15A</i> | 104 | 80  | 73  | 72  |
| <i>RASGRP2</i>  | 88  | 86  | 87  | 66  |
| <i>SCAMP1</i>   | 106 | 102 | 67  | 99  |
| <i>RAB3A</i>    | 93  | 89  | 70  | 89  |
| <i>E2F6</i>     | 70  | 70  | 72  | 65  |
| <i>MRPL19</i>   | 87  | 91  | 83  | 90  |
| <i>RXRB</i>     | 81  | 73  | 83  | 73  |
| <i>BCL2L1</i>   | 87  | 105 | 71  | 88  |
| <i>CCNH</i>     | 86  | 101 | 87  | 97  |
| <i>EFNA3</i>    | 83  | 78  | 82  | 86  |
| <i>DRD5</i>     | 63  | 63  | 68  | 77  |
| <i>PDGFRA</i>   | 73  | 76  | 89  | 83  |
| <i>RARA</i>     | 73  | 79  | 84  | 82  |
| <i>ARMC6</i>    | 105 | 79  | 69  | 87  |
| <i>BAG2</i>     | 70  | 71  | 72  | 73  |
| <i>ATN1</i>     | 81  | 65  | 78  | 76  |
| <i>ARL3</i>     | 74  | 67  | 71  | 82  |
| <i>DOK5</i>     | 88  | 97  | 102 | 85  |
| <i>MMACHC</i>   | 72  | 63  | 76  | 74  |
| <i>APOH</i>     | 83  | 64  | 69  | 69  |
| <i>THEM2</i>    | 87  | 82  | 78  | 92  |
| <i>ALDH3B2</i>  | 73  | 77  | 86  | 71  |
| <i>KIF17</i>    | 72  | 89  | 67  | 93  |

|                |    |    |    |    |
|----------------|----|----|----|----|
| <i>PPP4C</i>   | 88 | 77 | 74 | 82 |
| <i>B3GALT4</i> | 66 | 80 | 74 | 84 |
| <i>AGGF1</i>   | 84 | 87 | 81 | 66 |
| <i>ITGA9</i>   | 86 | 77 | 74 | 72 |
| <i>HSPB3</i>   | 76 | 92 | 68 | 68 |

**Table S2: A comparative account of the network properties of mental disorders.**

| Network property       | Normal  | Unipolar depression | Bipolar disorder | Schizophrenia |
|------------------------|---------|---------------------|------------------|---------------|
| Diameter               | 0.01177 | 0.01269             | 0.00907          | 0.010355      |
| Clustering coefficient | 0.43078 | 0.45066             | 0.43158          | 0.43424       |
| Density                | 0.36285 | 0.36026             | 0.35072          | 0.36235       |
| No. of edges           | 9390    | 9323                | 9076             | 9377          |
| Shortest path          | 0.00412 | 0.00418             | 0.00331          | 0.00415       |

**Table S3: A comparative account of the degrees of nodes (genes) in the mental disorder networks.**

| Candidate gene | Normal | Unipolar depression | Bipolar disorder | Schizophrenia |
|----------------|--------|---------------------|------------------|---------------|
| <i>NRG1</i>    | 88     | 89                  | 105              | 96            |
| <i>DISC1</i>   | 69     | 108                 | 69               | 72            |
| <i>COMT</i>    | 82     | 78                  | 87               | 73            |
| <i>BDNF</i>    | 90     | 76                  | 85               | 83            |

**Table S4: A comparative account of the clustering coefficient of nodes (genes) in the mental disorder networks.**

| Candidate gene | Normal | Unipolar depression | Bipolar disorder | Schizophrenia |
|----------------|--------|---------------------|------------------|---------------|
| <i>NRG1</i>    | 0.46   | 0.44                | 0.48             | 0.45          |
| <i>DISC1</i>   | 0.40   | 0.48                | 0.45             | 0.37          |
| <i>COMT</i>    | 0.42   | 0.34                | 0.44             | 0.43          |
| <i>BDNF</i>    | 0.44   | 0.47                | 0.42             | 0.42          |

**Table S5: A comparative account of the closeness of nodes (genes) in the mental disorder networks.**

| Candidate gene | Normal | Unipolar depression | Bipolar disorder | Schizophrenia |
|----------------|--------|---------------------|------------------|---------------|
| <i>NRG1</i>    | 0.62   | 0.62                | 0.65             | 0.63          |
| <i>DISC1</i>   | 0.59   | 0.65                | 0.58             | 0.59          |
| <i>COMT</i>    | 0.61   | 0.60                | 0.62             | 0.59          |
| <i>BDNF</i>    | 0.62   | 0.60                | 0.61             | 0.61          |



**Table S6: The first-neighbors of the *NRG1* gene in different disease condition. The genes indicated in the bold are common with the *COMT*, *BDNF* and *DISC1* in a particular disease condition.**

| <b>CONTROL</b>      | <b>DEP+BPD+SCZ</b> | <b>BPD+SCZ</b> | <b>SCZ</b>           |
|---------------------|--------------------|----------------|----------------------|
| <i>BDNF</i>         | <i>COMT</i>        | <i>POLR2A</i>  | <b><i>GOLGA3</i></b> |
| <i>HOXD1</i>        | <i>PKD1</i>        | <i>PIK3R3</i>  | <i>EP400</i>         |
| <i>PCGF2</i>        | <i>TUBA3C</i>      | <i>DOT1L</i>   | <i>SLC29A1</i>       |
| <b><i>EPHB3</i></b> | <i>CD9</i>         | <i>REM1</i>    | <i>FOXH1</i>         |
| <i>CYB561D2</i>     | <i>DPH1</i>        | <i>ARIH2</i>   | <i>CYP2A7</i>        |
| <i>NPTX2</i>        | <i>VPS39</i>       | <i>AKAP8</i>   | <i>BMP6</i>          |
| <i>AP4S1</i>        | <i>OSTF1</i>       | <i>COX7A2A</i> | <b><i>SF3A2</i></b>  |
| <i>FNTB</i>         | <i>SLC25A1</i>     | <i>SUMO</i>    | <i>AVIL</i>          |
| <i>WNT7A</i>        | <i>MRAS</i>        | <i>DPT</i>     | <i>ZNF507</i>        |
| <i>GHMPB2</i>       | <i>ARMC6</i>       | <i>HIFX</i>    | <i>RERI</i>          |
| <i>IGF2BP3</i>      | <i>AGGF1</i>       |                | <i>MSC</i>           |
| <i>DOC2A</i>        |                    |                | <i>PDK2</i>          |
| <i>NAV3</i>         |                    |                | <i>CCL4</i>          |
| <i>ATN1</i>         |                    |                | <i>RHOBTB2</i>       |
| <i>ARL3</i>         |                    |                | <i>IQCK</i>          |
| <i>ITGA9</i>        |                    |                | <b><i>CDC34</i></b>  |
| <i>HSBP3</i>        |                    |                | <i>ZNF175</i>        |
|                     |                    |                | <i>PPT2</i>          |
|                     |                    |                | <i>MRPL19</i>        |
|                     |                    |                | <i>BAG2</i>          |
|                     |                    |                | <b><i>MMACHC</i></b> |
|                     |                    |                | <i>APOH</i>          |

**Table S7: The first-neighbors of the *DISC1* gene in different disease condition. The genes indicated in the bold are common with the *COMT*, *BDNF* and *NRG1* in a particular disease condition.**

| CONTROL        | DEP+BPD+SCZ        | BPD+SCZ         | SCZ                   |
|----------------|--------------------|-----------------|-----------------------|
| <i>IDO1</i>    | <i>TLX1</i>        | <i>WDR45</i>    | <b><i>COMT</i></b>    |
| <i>EIF2B4</i>  | <i>PXDN</i>        | <i>PBX021</i>   | <i>DSTYK</i>          |
| <i>PRPSAP1</i> | <i>PKD1</i>        | <i>COL11A2</i>  | <i>TUBA3C</i>         |
| <i>OSTF1</i>   | <i>CYP2B6</i>      | <i>TBC1D4</i>   | <i>HEG1</i>           |
| <i>PDE1A</i>   | <i>AVIL</i>        | <i>FGFR1</i>    | <i>STMN2</i>          |
| <i>JMJD6</i>   | <i>RPS6KA1</i>     | <i>GNA12</i>    | <i>PPAP2A</i>         |
| <i>COPB1</i>   | <i>LMNB2</i>       | <i>IGF2BP3</i>  | <i>SLC25A2</i>        |
| <i>RAC3</i>    | <i>TACC2</i>       | <i>PPP1R15A</i> | <i>HDAC5</i>          |
| <i>MMP15</i>   | <b><i>PDK2</i></b> |                 | <i>MRAS</i>           |
| <i>LPCAT1</i>  | <i>ZNF428</i>      |                 | <i>ZNF165</i>         |
| <i>IHH</i>     | <i>HTRA2</i>       |                 | <b><i>CSNK2A1</i></b> |
|                | <i>PPEF1</i>       |                 | <i>MR1</i>            |
|                |                    |                 | <b><i>CDC34</i></b>   |
|                |                    |                 | <i>E2F6</i>           |
|                |                    |                 | <b><i>MMACHC</i></b>  |
|                |                    |                 | <i>PPP4C</i>          |

**Table S8: The first-neighbors of the *COMT* in different disease condition. The genes indicated in the bold are common with the *DISC1*, *BDNF* and *NRG1* in a particular disease condition.**

| CONTROL             | DEP+BPD+SCZ          | BPD+SCZ          | SCZ                   |
|---------------------|----------------------|------------------|-----------------------|
| <i>PIK3R3</i>       | <i>NRG1</i>          | <i>CPSF4</i>     | <i>DISC1</i>          |
| <i>NFASC</i>        | <i>FOXH1</i>         | <i>MRPL33</i>    | <i>BDNF</i>           |
| <i>DOT1L</i>        | <i>PIP4K2A</i>       | <i>NPTX1</i>     | <i>POMZP3</i>         |
| <i>TLX1</i>         | <b><i>PDK2</i></b>   | <i>TNFRSF11A</i> | <i>EFNA5</i>          |
| <i>TUBA3CDE</i>     | <i>TEK</i>           | <i>PARVB</i>     | <i>STX12</i>          |
| <i>IDO1</i>         | <b><i>MMACHC</i></b> | <i>OSTF1</i>     | <i>SF3A2</i>          |
| <i>TBC1D4</i>       |                      | <i>RAD50</i>     | <i>MYBL1</i>          |
| <i>CNOT8</i>        |                      | <i>WNT7A</i>     | <i>STMN2</i>          |
| <i>HSF2</i>         |                      | <i>HDAC5</i>     | <i>MAP3K8</i>         |
| <i>PRPSAP1</i>      |                      | <i>NR1H2</i>     | <i>COPB1</i>          |
| <i>PDK3</i>         |                      | <i>ZNF165</i>    | <i>LMNB2</i>          |
| <i>JMJD6</i>        |                      | <i>B3GALT4</i>   | <i>PCGF2</i>          |
| <i>TLE4</i>         |                      |                  | <i>HTR2A</i>          |
| <i>DPT</i>          |                      |                  | <i>ARHGEF15</i>       |
| <i>PPAP2A</i>       |                      |                  | <i>AGPAT1</i>         |
| <b><i>EPHB3</i></b> |                      |                  | <i>APITD1</i>         |
| <i>POLR2E</i>       |                      |                  | <b><i>CSNK2A1</i></b> |
| <i>MPV17</i>        |                      |                  | <i>PPEF1</i>          |
| <i>OPA1</i>         |                      |                  | <i>BCL2L1</i>         |
| <i>LPCAT1</i>       |                      |                  | <i>CCNH</i>           |
| <i>TOMM40</i>       |                      |                  | <i>DRD5</i>           |
| <i>KIR3DL2</i>      |                      |                  |                       |

**Table S9: The first-neighbors of the *BDNF* in different disease condition. The genes indicated in the bold are common with the *DISC1*, *COMT* and *NRG1* in a particular disease condition.**

| <b>CONTROL</b>  | <b>DEP+BPD+SCZ</b>   | <b>BPD+SCZ</b>  | <b>SCZ</b>           |
|-----------------|----------------------|-----------------|----------------------|
| <i>NRG1</i>     | <i>DOTIL</i>         | <i>SFRS16</i>   | <b><i>COMT</i></b>   |
| <i>INBKAP</i>   | <i>PVT1</i>          | <i>FYB</i>      | <i>GCN1L1</i>        |
| <i>GNE</i>      | <i>FNTB</i>          | <i>RPP30</i>    | <b><i>GOLGA3</i></b> |
| <i>COX7A2L</i>  | <i>RFC5</i>          | <i>ARHGEF15</i> | <i>ARIH2</i>         |
| <i>TUBG1</i>    | <i>ATN1</i>          | <i>PPT2</i>     | <i>SNRNP70</i>       |
| <i>VAPB</i>     | <b><i>MMACHC</i></b> |                 | <i>FBX021</i>        |
| <i>ATP6VIB2</i> |                      |                 | <i>CYP2B6</i>        |
| <i>HSF2</i>     |                      |                 | <i>CD9</i>           |
| <i>STMN2</i>    |                      |                 | <i>MTF1</i>          |
| <i>PPAP2A</i>   |                      |                 | <i>COBRA1</i>        |
| <i>TFDP1</i>    |                      |                 | <i>CDV3</i>          |
| <i>HDAC5</i>    |                      |                 | <b><i>SF3A2</i></b>  |
| <i>BCL2L1</i>   |                      |                 | <i>VPS39</i>         |
| <i>AGGF1</i>    |                      |                 | <i>RPS6KA1</i>       |
| <i>ITGA9</i>    |                      |                 | <i>RABGGTA</i>       |
|                 |                      |                 | <i>PTPRN</i>         |
|                 |                      |                 | <i>SMC4</i>          |
|                 |                      |                 | <i>SH3BP1</i>        |
|                 |                      |                 | <i>VEGFB</i>         |
|                 |                      |                 | <i>PPP4C</i>         |

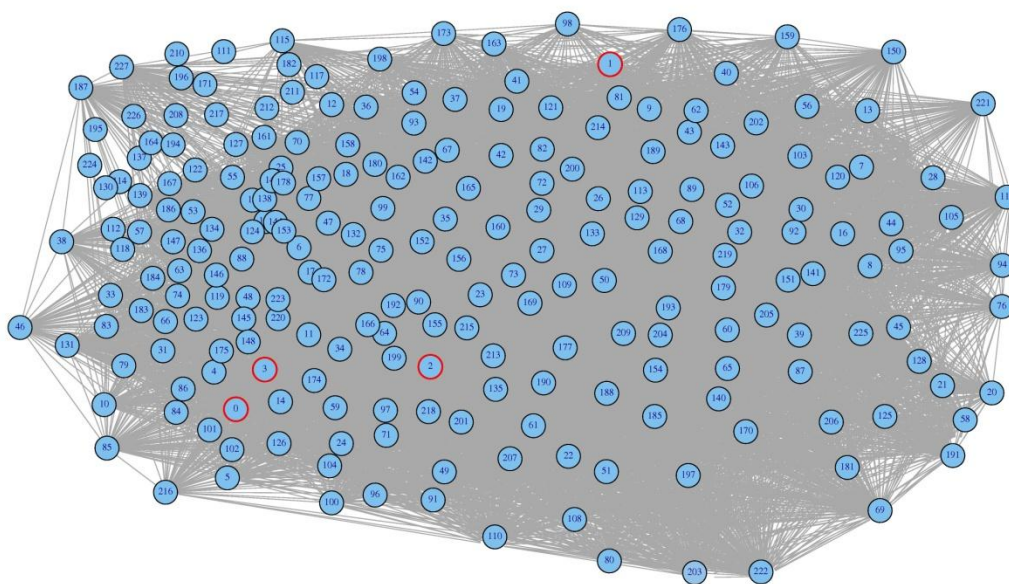

**Figure S1: The gene coexpression normal network.**

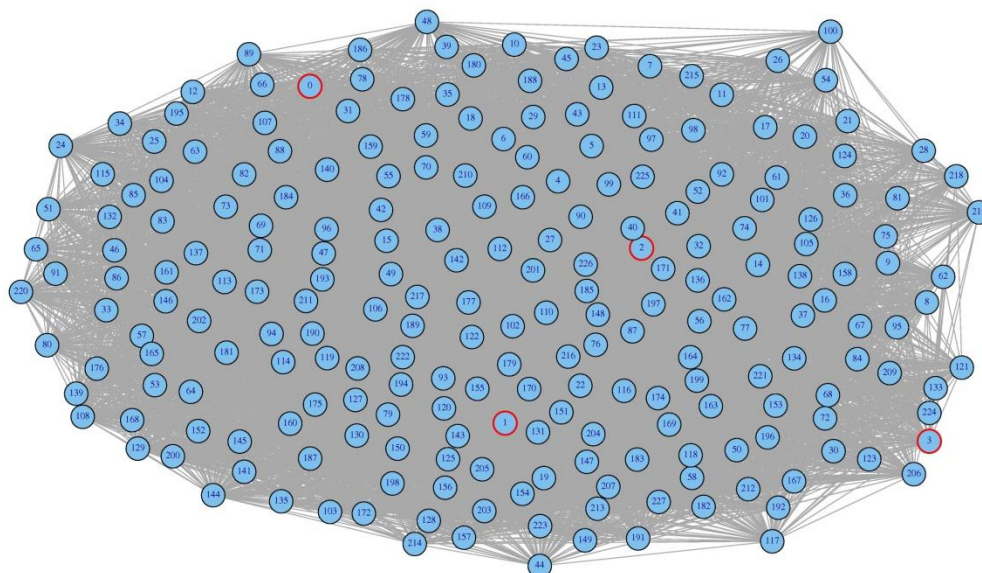

**Figure S2: The gene coexpression unipolar disorder network.**



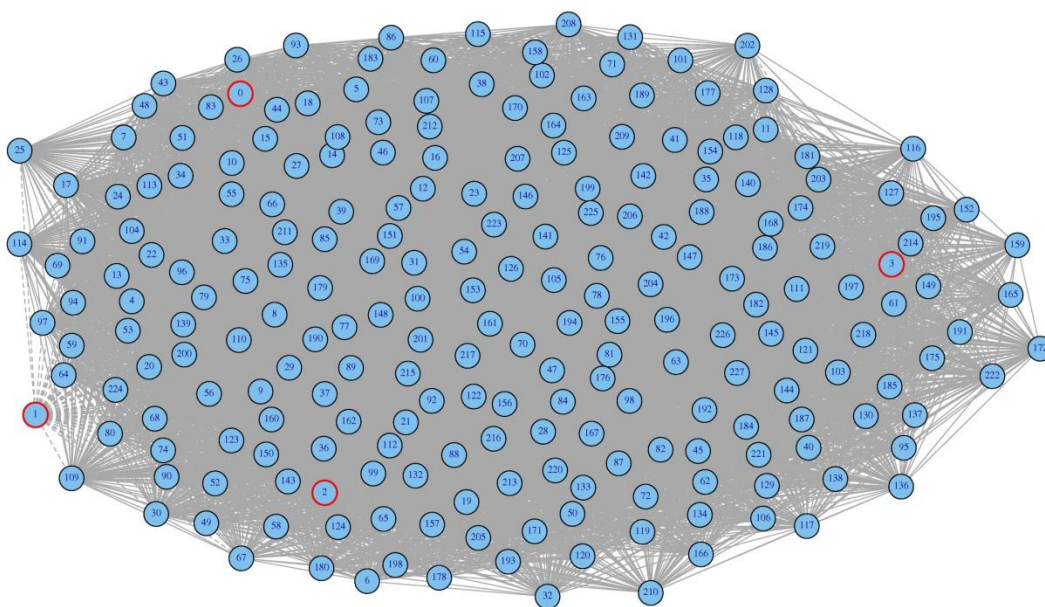

**Figure S3: The gene coexpression bipolar disorder network.**

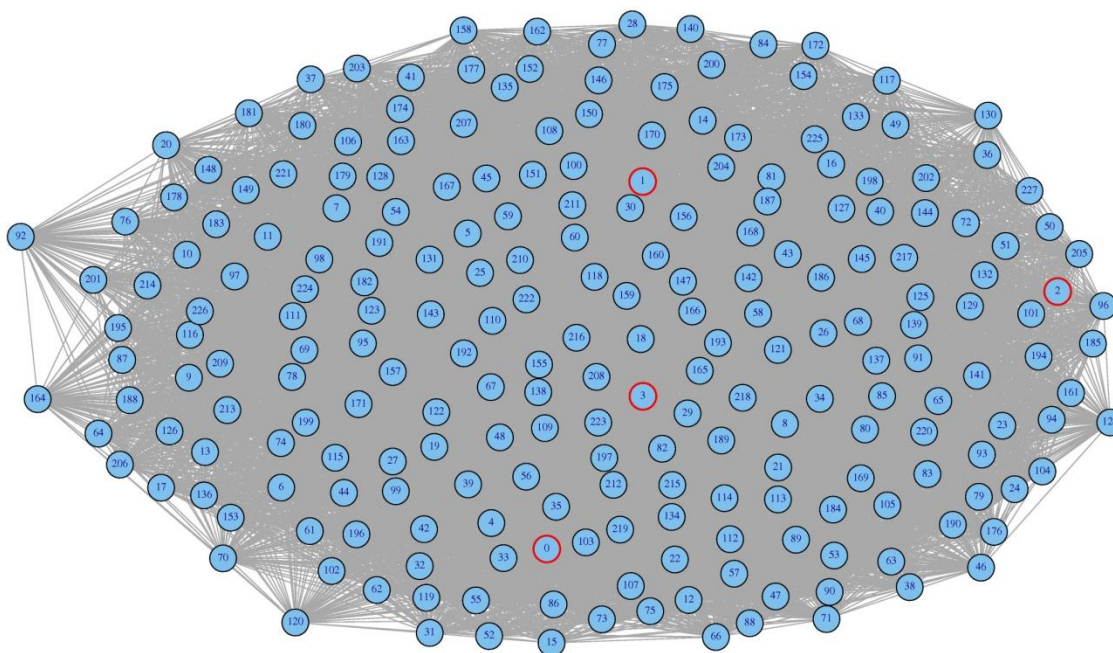

**Figure S4: The gene coexpression schizophrenia network.**
